# Supplementary material
Source: PubMed Central journal article supplement (PMC6743087)
Supplement: supp_TableS1.pdf [file supp_TableS1.pdf]

## Supplementary Data

SUPPLEMENTARY TABLE S1. ANTIDEPRESSANT MEDICATIONS USED TO IDENTIFY PREPREGNANCY DEPRESSION

| <i>Medication class</i>                                | <i>Medications</i>                                                                                                                |
|--------------------------------------------------------|-----------------------------------------------------------------------------------------------------------------------------------|
| Selective serotonin reuptake inhibitor                 | Citalopram, escitalopram, fluoxetine, fluvoxamine, paroxetine, sertraline                                                         |
| Serotonin and norepinephrine reuptake inhibitors       | Duloxetine, milnacipran, venlafaxine                                                                                              |
| Tricyclic antidepressants                              | Amitriptyline, amoxapine, clomipramine, desipramine, doxepin, imipramine, maprotiline, nortriptyline, protriptyline, trimipramine |
| Serotonin antagonist and reuptake inhibitor            | Nefazodone, trazodone                                                                                                             |
| Norepinephrine dopamine reuptake inhibitor             | Bupropion                                                                                                                         |
| Monoamine oxidase inhibitor                            | Isocarboxazid, phenelzine, selegiline, tranylcypromine                                                                            |
| Serotonin partial agonist-reuptake inhibitor           | Vilazodone                                                                                                                        |
| Selective norepinephrine reuptake inhibitor            | Atomoxetine                                                                                                                       |
| Noradrenergic and specific serotonergic antidepressant | Mirtazapine                                                                                                                       |
