# Supplementary material
Source: PubMed Central journal article supplement (PMC6743087)
Supplement: supp_TableS2.pdf [file supp_TableS2.pdf]

SUPPLEMENTARY TABLE S2. INSTITUTE OF MEDICINE  
GESTATIONAL WEIGHT GAIN RATE RECOMMENDATIONS

---

| <i>Prepregnancy weight category</i> | <i>Recommended rates of weight gain in the second and third trimesters (lb/week)</i> |
|-------------------------------------|--------------------------------------------------------------------------------------|
| Underweight                         | 1–1.3                                                                                |
| Normal Weight                       | 0.8–1                                                                                |
| Overweight                          | 0.5–0.7                                                                              |
| Obese                               | 0.4–0.6                                                                              |

---

*Source:* Modified from Institute of Medicine (US). Weight gain during pregnancy: reexamining the guidelines. Washington, DC: National Academies Press, 2009.
