# Supplementary material
Source: PubMed Central journal article supplement (PMC6743087)
Supplement: supp_TableS3.pdf [file supp_TableS3.pdf]

SUPPLEMENTARY TABLE S3. ASSOCIATIONS OF PRE- AND EARLY PREGNANCY DEPRESSIVE SYMPTOMS WITH GESTATIONAL WEIGHT GAIN RATE (LBS/WEEK) BY EARLY PREGNANCY DEPRESSION SEVERITY

|                                                            | N      | Mean difference <sup>a</sup><br>(95% CI) | N      | RR <sup>a</sup> (95% CI)<br>for GWG<br>below the IOM<br>recommendations | N      | RR <sup>a</sup> (95% CI)<br>for GWG<br>above the IOM<br>recommendations |
|------------------------------------------------------------|--------|------------------------------------------|--------|-------------------------------------------------------------------------|--------|-------------------------------------------------------------------------|
| No depressive symptoms in pre- or early pregnancy          | 72,567 | Reference                                | 16,984 | Reference                                                               | 39,870 | Reference                                                               |
| Prepregnancy onset depression                              |        |                                          |        |                                                                         |        |                                                                         |
| No early pregnancy depressive symptoms                     | 3893   | 0.00 (−0.01 to 0.01)                     | 934    | 1.09 (1.05 to 1.14)                                                     | 2249   | 1.02 (1.00 to 1.05)                                                     |
| Mild early pregnancy depressive symptoms (PHQ-9 5–10)      | 2299   | 0.00 (−0.01 to 0.02)                     | 561    | 1.14 (1.08 to 1.20)                                                     | 1346   | 1.04 (1.01 to 1.07)                                                     |
| Moderate early pregnancy depressive symptoms (PHQ-9 10–14) | 912    | 0.00 (−0.03 to 0.03)                     | 223    | 1.10 (1.00 to 1.19)                                                     | 529    | 1.02 (0.98 to 1.06)                                                     |
| Severe early pregnancy depressive symptoms (PHQ-9 ≥ 15)    | 592    | −0.02 (−0.06 to 0.02)                    | 159    | 1.09 (0.99 to 1.21)                                                     | 322    | 0.99 (0.93 to 1.04)                                                     |
| Early pregnancy onset depression                           |        |                                          |        |                                                                         |        |                                                                         |
| Mild (PHQ-9 < 10)                                          | 1064   | 0.05 (0.01 to 0.08)                      | 244    | 1.04 (0.95 to 1.13)                                                     | 622    | 1.04 (1.00 to 1.08)                                                     |
| Moderate (PHQ-9 10–14)                                     | 4699   | 0.02 (0.01 to 0.03)                      | 1120   | 1.02 (0.98 to 1.06)                                                     | 2629   | 1.02 (1.00 to 1.04)                                                     |
| Severe (PHQ-9 ≥ 15)                                        | 1574   | 0.05 (0.02 to 0.07)                      | 357    | 1.01 (0.94 to 1.08)                                                     | 917    | 1.05 (1.02 to 1.08)                                                     |

<sup>a</sup>Model is adjusted for maternal age, race/ethnicity (white, black, Hispanic, Asian/Pacific Islander, Native American/multiracial, other/unknown), nulliparity (Y/N), Medicaid (Y/N), smoking in first 20 weeks of pregnancy (Y/N), alcohol use in first 20 weeks of pregnancy (Y/N), and prepregnancy BMI category (underweight, normal weight, overweight, obese).

GWG, gestational weight gain; IOM, Institute of Medicine; BMI, body mass index; CI, confidence intervals; RR, relative risks.
