# Supplementary material
Source: PubMed Central journal article supplement (PMC6743087)
Supplement: supp_TableS4.pdf [file supp_TableS4.pdf]

SUPPLEMENTARY TABLE S4. ASSOCIATIONS OF PRE- AND EARLY PREGNANCY DEPRESSIVE SYMPTOMS WITH GESTATIONAL WEIGHT GAIN RATE (LBS/WEEK) BY RACE/ETHNICITY

|                                                   | N      | Mean difference <sup>a</sup><br>(95% CI) | N    | RR <sup>a</sup> (95% CI) for<br>GWG below the IOM<br>recommendations | N      | RR <sup>a</sup> (95% CI) for<br>GWG above<br>the IOM<br>recommendations |
|---------------------------------------------------|--------|------------------------------------------|------|----------------------------------------------------------------------|--------|-------------------------------------------------------------------------|
| <b>Non-Hispanic white</b>                         |        |                                          |      |                                                                      |        |                                                                         |
| No depressive symptoms in pre- or early pregnancy | 29,790 | Reference                                | 5505 | Reference                                                            | 18,043 | Reference                                                               |
| Prepregnancy onset depression                     | 4238   | -0.01 (-0.02 to 0.01)                    | 951  | 1.17 (1.11 to 1.23)                                                  | 2556   | 1.03 (1.01 to 1.05)                                                     |
| Early pregnancy onset depression                  | 1963   | 0.05 (0.01 to 0.09)                      | 336  | 1.06 (0.96 to 1.18)                                                  | 1286   | 1.05 (1.01 to 1.09)                                                     |
| <b>Non-Hispanic black</b>                         |        |                                          |      |                                                                      |        |                                                                         |
| No depressive symptoms in pre- or early pregnancy | 3669   | Reference                                | 922  | Reference                                                            | 2117   | Reference                                                               |
| Prepregnancy onset depression                     | 535    | -0.03 (-0.08 to 0.02)                    | 161  | 1.06 (0.95 to 1.19)                                                  | 289    | 1.00 (0.94 to 1.06)                                                     |
| Early pregnancy onset depression                  | 807    | 0.09 (0.01 to 0.17)                      | 190  | 1.03 (0.88 to 1.21)                                                  | 490    | 1.06 (0.98 to 1.14)                                                     |
| <b>Hispanic</b>                                   |        |                                          |      |                                                                      |        |                                                                         |
| No depressive symptoms in pre- or early pregnancy | 17,632 | Reference                                | 4349 | Reference                                                            | 9695   | Reference                                                               |
| Prepregnancy onset depression                     | 2223   | 0.02 (0.00 to 0.05)                      | 490  | 1.06 (0.99 to 1.03)                                                  | 1043   | 1.03 (1.00 to 1.07)                                                     |
| Early pregnancy onset depression                  | 1878   | 0.04 (-0.01 to 0.08)                     | 547  | 1.02 (0.91 to 1.13)                                                  | 1204   | 1.04 (0.98 to 1.10)                                                     |
| <b>Asian/Pacific Islander</b>                     |        |                                          |      |                                                                      |        |                                                                         |
| No depressive symptoms in pre- or early pregnancy | 18,368 | Reference                                | 5545 | Reference                                                            | 8238   | Reference                                                               |
| Prepregnancy onset depression                     | 639    | 0.03 (0.00 to 0.06)                      | 165  | 0.96 (0.95 to 1.08)                                                  | 327    | 1.05 (0.99 to 1.12)                                                     |
| Early pregnancy onset depression                  | 1987   | 0.03 (-0.02 to 0.08)                     | 565  | 0.99 (0.83 to 1.17)                                                  | 964    | 1.05 (0.94 to 1.17)                                                     |
| <b>Native American/multiracial</b>                |        |                                          |      |                                                                      |        |                                                                         |
| No depressive symptoms in pre- or early pregnancy | 2484   | Reference                                | 513  | Reference                                                            | 1449   | Reference                                                               |
| Prepregnancy onset depression                     | 352    | -0.01 (-0.07 to 0.05)                    | 95   | 1.21 (1.03 to 1.42)                                                  | 201    | 1.02 (0.95 to 1.10)                                                     |
| Early pregnancy onset depression                  | 281    | 0.00 (-0.10 to 0.10)                     | 63   | 1.15 (0.90 to 1.46)                                                  | 183    | 1.07 (0.96 to 1.19)                                                     |
| <b>Other/unknown</b>                              |        |                                          |      |                                                                      |        |                                                                         |
| No depressive symptoms in pre- or early pregnancy | 624    | Reference                                | 150  | Reference                                                            | 328    | Reference                                                               |
| Prepregnancy onset depression                     | 54     | 0.06 (-0.08 to 0.20)                     | 15   | Did not converge                                                     | 30     | 1.09 (0.89 to 1.34)                                                     |
| Early pregnancy onset depression                  | 76     | 0.04 (-0.14 to 0.22)                     | 20   | Did not converge                                                     | 41     | 0.99 (0.65 to 1.52)                                                     |

<sup>a</sup>Model is adjusted for maternal age, nulliparity (Y/N), Medicaid (Y/N), smoking in first 20 weeks of pregnancy (Y/N), alcohol use in first 20 weeks of pregnancy (Y/N), prepregnancy BMI category (underweight, normal weight, overweight, obese), and severity of early pregnancy depressive symptoms (mild, moderate, severe).

P for interaction=0.04 for continuous GWG rate, 0.001 for GWG below IOM, 0.001 for GWG above IOM.
