# Supplementary material
Source: PubMed Central journal article supplement (PMC6743087)
Supplement: supp_TableS5.pdf [file supp_TableS5.pdf]

SUPPLEMENTARY TABLE S5. ASSOCIATIONS OF PRE- AND EARLY PREGNANCY DEPRESSIVE SYMPTOMS  
WITH GESTATIONAL WEIGHT GAIN RATE (LBS/WEEK) STARTING AT FIRST DEPRESSION  
SCREENING OR DIAGNOSIS (LBS/WEEK)

|                                                      | N      | Mean difference <sup>a</sup><br>(95% CI) | N      | RR <sup>a</sup> (95% CI)<br>for GWG below<br>the IOM<br>recommendations | N      | RR <sup>a</sup> (95% CI)<br>for GWG above<br>the IOM<br>recommendations |
|------------------------------------------------------|--------|------------------------------------------|--------|-------------------------------------------------------------------------|--------|-------------------------------------------------------------------------|
| No depressive symptoms in pre-<br>or early pregnancy | 72,567 | Reference                                | 17,165 | Reference                                                               | 39,659 | Reference                                                               |
| Prepregnancy onset depression                        | 7696   | 0.00 (-0.01 to 0.01)                     | 1903   | 1.11 (1.07 to 1.15)                                                     | 4414   | 1.03 (1.01 to 1.04)                                                     |
| Early pregnancy onset<br>depression                  | 7337   | 0.04 (0.02 to 0.07)                      | 1721   | 1.03 (0.97 to 1.09)                                                     | 4168   | 1.04 (1.02 to 1.07)                                                     |

<sup>a</sup>Model is adjusted for maternal age, race/ethnicity (non-Hispanic white, non-Hispanic black, Hispanic, Asian/Pacific Islander, Native American/multiracial, other/unknown), nulliparity (Y/N), Medicaid (Y/N), smoking in first 20 weeks of pregnancy (Y/N), alcohol use in first 20 weeks of pregnancy (Y/N), prepregnancy BMI category (underweight, normal weight, overweight, obese), and severity of early pregnancy depressive symptoms (mild, moderate, severe).
