# Supplementary material
Source: PubMed Central journal article supplement (PMC6743087)
Supplement: supp_TableS6.pdf [file supp_TableS6.pdf]

SUPPLEMENTARY TABLE S6. ASSOCIATIONS OF PRE- AND EARLY PREGNANCY DEPRESSIVE SYMPTOMS WITH GESTATIONAL WEIGHT GAIN RATE (LBS/WEEK) AMONG WOMEN WITH MEASURED PREPREGNANCY WEIGHT

|                                                   | N      | Mean difference <sup>a</sup><br>(95% CI) | N      | RR <sup>a</sup> (95% CI)<br>for GWG<br>below the IOM<br>recommendations | N      | RR <sup>a</sup> (95% CI)<br>for GWG<br>above the IOM<br>recommendations |
|---------------------------------------------------|--------|------------------------------------------|--------|-------------------------------------------------------------------------|--------|-------------------------------------------------------------------------|
| No depressive symptoms in pre- or early pregnancy | 62,807 | Reference                                | 14,798 | Reference                                                               | 34,353 | Reference                                                               |
| Prepregnancy onset depression                     | 7357   | 0.00 (-0.01 to 0.02)                     | 1793   | 1.11 (1.07 to 1.15)                                                     | 4250   | 1.03 (1.02 to 1.05)                                                     |
| Early pregnancy onset depression                  | 6549   | 0.04 (0.02 to 0.07)                      | 1536   | 1.04 (0.98 to 1.11)                                                     | 3728   | 1.05 (1.02 to 1.08)                                                     |

<sup>a</sup>Model is adjusted for maternal age, race/ethnicity (non-Hispanic white, non-Hispanic black, Hispanic, Asian/Pacific Islander, Native American/multiracial, other/unknown), nulliparity (Y/N), Medicaid (Y/N), smoking in first 20 weeks of pregnancy (Y/N), alcohol use in first 20 weeks of pregnancy (Y/N), prepregnancy BMI category (underweight, normal weight, overweight, obese), and severity of early pregnancy depressive symptoms (mild, moderate, severe).
