# Supplementary material
Source: PubMed Central journal article supplement (PMC6743087)
Supplement: supp_TableS7.pdf [file supp_TableS7.pdf]

SUPPLEMENTARY TABLE S7. ASSOCIATIONS OF PRE- AND EARLY PREGNANCY DEPRESSIVE SYMPTOMS WITH GESTATIONAL WEIGHT GAIN RATE (LBS/WEEK) IN NULLIPAROUS WOMEN WITH LAST MEASURED PRENATAL WEIGHT  $\geq 37$  WEEKS

|                                                         | N      | Mean difference <sup>a</sup><br>(95% CI) | N    | RR <sup>a</sup> (95% CI)<br>for GWG below the<br>IOM recommendations | N      | RR <sup>a</sup> (95% CI)<br>for GWG above the<br>IOM recommendations |
|---------------------------------------------------------|--------|------------------------------------------|------|----------------------------------------------------------------------|--------|----------------------------------------------------------------------|
| No depressive symptoms<br>in pre- or early<br>pregnancy | 23,620 | Reference                                | 4636 | Reference                                                            | 14,148 | Reference                                                            |
| Prepregnancy onset<br>depression                        | 2362   | 0.01 (-0.01 to 0.03)                     | 448  | 1.11 (1.03 to 1.19)                                                  | 1512   | 1.02 (1.00 to 1.05)                                                  |
| Early pregnancy onset<br>depression                     | 2487   | 0.03 (-0.01 to 0.07)                     | 475  | 1.09 (0.96 to 1.24)                                                  | 1557   | 1.04 (1.00 to 1.09)                                                  |

<sup>a</sup>Model is adjusted for maternal age, race/ethnicity (non-Hispanic white, non-Hispanic black, Hispanic, Asian/Pacific Islander, Native American/multiracial, other/unknown), nulliparity (Y/N), Medicaid (Y/N), smoking in first 20 weeks of pregnancy (Y/N), alcohol use in first 20 weeks of pregnancy (Y/N), prepregnancy BMI category (underweight, normal weight, overweight, obese), severity of early pregnancy depressive symptoms (mild, moderate, severe), and gestational age at last prenatal weight (weeks).
