# Supplementary material
Source: PubMed Central journal article supplement (PMC6743087)
Supplement: supp_TableS8.pdf [file supp_TableS8.pdf]

SUPPLEMENTARY TABLE S8. CHARACTERISTICS OF PREGNANCIES WITH PREPREGNANCY ONSET DEPRESSION BY GESTATIONAL WEIGHT GAIN CATEGORIES, KAISER PERMANENTE NORTHERN CALIFORNIA 2011–2016

|                                                                                         | <i>GWG rate below IOM (N=1877)</i> | <i>GWG rate within IOM (N=1373)</i> | <i>GWG rate above IOM (N=4446)</i> |
|-----------------------------------------------------------------------------------------|------------------------------------|-------------------------------------|------------------------------------|
| <b>Sociodemographic characteristics</b>                                                 |                                    |                                     |                                    |
| Age (years), mean (SD)                                                                  | 30.7 (5.7)                         | 30.7 (5.7)                          | 29.7 (5.7)                         |
| Race/ethnicity, <i>n</i> (%)                                                            |                                    |                                     |                                    |
| Non-Hispanic white                                                                      | 951 (51)                           | 731 (53)                            | 2556 (57)                          |
| Non-Hispanic black                                                                      | 161 (9)                            | 85 (6)                              | 289 (7)                            |
| Hispanic                                                                                | 490 (26)                           | 345 (25)                            | 1043 (23)                          |
| Asian/Pacific Islander                                                                  | 165 (9)                            | 147 (11)                            | 327 (7)                            |
| Native American/multiracial                                                             | 95 (5)                             | 56 (4)                              | 201 (5)                            |
| Other/unknown                                                                           | 15 (1)                             | 9 (1)                               | 30 (1)                             |
| Prepregnancy BMI category, <i>n</i> (%)                                                 |                                    |                                     |                                    |
| Underweight                                                                             | 90 (5)                             | 59 (4)                              | 39 (1)                             |
| Normal weight                                                                           | 805 (43)                           | 665 (48)                            | 1574 (35)                          |
| Overweight                                                                              | 316 (17)                           | 291 (21)                            | 1490 (34)                          |
| Obese                                                                                   | 666 (35)                           | 358 (26)                            | 1343 (30)                          |
| Timing of measured weight used for prepregnancy BMI, <i>n</i> (%)                       |                                    |                                     |                                    |
| Within 12 months before pregnancy                                                       | 1793 (96)                          | 1314 (96)                           | 4250 (96)                          |
| Within first 10 weeks of pregnancy                                                      | 84 (4)                             | 59 (4)                              | 196 (4)                            |
| Medicaid, <i>n</i> (%)                                                                  | 275 (15)                           | 168 (12)                            | 541 (12)                           |
| <b>Pregnancy characteristics</b>                                                        |                                    |                                     |                                    |
| Nulliparous, <i>n</i> (%)                                                               | 528 (28)                           | 439 (32)                            | 1707 (38)                          |
| Smoking during early pregnancy, <i>n</i> (%)                                            | 160 (9)                            | 108 (8)                             | 449 (10)                           |
| Alcohol use during early pregnancy, <i>n</i> (%)                                        | 719 (38)                           | 559 (41)                            | 1818 (41)                          |
| Gestational age at first prenatal visit (weeks), mean (SD)                              | 5.8 (2.1)                          | 5.9 (2.0)                           | 6.0 (2.2)                          |
| Gestational age at diagnosis or last PHQ-9 before 20 weeks gestation (weeks), mean (SD) | 8.3 (3.1)                          | 8.7 (3.1)                           | 9.3 (3.4)                          |
| Gestational age at last weight before delivery (weeks), mean (SD)                       | 38.0 (2.7)                         | 38.5 (1.8)                          | 38.5 (1.9)                         |
| <b>Depression severity and treatment</b>                                                |                                    |                                     |                                    |
| Prepregnancy depression treatment, <i>n</i> (%)                                         |                                    |                                     |                                    |
| Medication and counseling                                                               | 542 (29)                           | 382 (28)                            | 1250 (28)                          |
| Medication only                                                                         | 873 (47)                           | 616 (45)                            | 2013 (45)                          |
| Counseling only                                                                         | 262 (14)                           | 209 (15)                            | 675 (15)                           |
| No treatment                                                                            | 200 (11)                           | 166 (12)                            | 508 (11)                           |
| Early pregnancy depressive symptom severity, <i>n</i> (%)                               |                                    |                                     |                                    |
| Very mild (PHQ-9 0–4)                                                                   | 934 (50)                           | 710 (52)                            | 2249 (51)                          |
| Mild (PHQ-9 5–9)                                                                        | 561 (30)                           | 392 (29)                            | 1346 (30)                          |
| Moderate (PHQ-9 10–14)                                                                  | 223 (12)                           | 160 (12)                            | 529 (12)                           |
| Severe (PHQ-9 ≥ 15)                                                                     | 159 (8)                            | 111 (8)                             | 322 (7)                            |
| Early pregnancy depression treatment, <i>n</i> (%)                                      |                                    |                                     |                                    |
| Medication and counseling                                                               | 330 (18)                           | 224 (16)                            | 800 (18)                           |
| Medication only                                                                         | 202 (11)                           | 131 (10)                            | 455 (10)                           |
| Counseling only                                                                         | 615 (33)                           | 465 (34)                            | 1576 (35)                          |
| No treatment                                                                            | 730 (39)                           | 553 (40)                            | 1615 (36)                          |
| Later pregnancy depressive symptoms (after 20 weeks), <i>n</i> (%)                      |                                    |                                     |                                    |
| Yes                                                                                     | 965 (51)                           | 688 (50)                            | 2101 (47)                          |
| No                                                                                      | 597 (32)                           | 443 (32)                            | 1528 (34)                          |
| No PHQ-9 after 20 weeks                                                                 | 315 (17)                           | 242 (18)                            | 817 (18)                           |

SD, standard deviation.
