# Supplementary material
Source: PubMed Central journal article supplement (PMC6743087)
Supplement: supp_TableS9.pdf [file supp_TableS9.pdf]

SUPPLEMENTARY TABLE S9. CHARACTERISTICS OF PREGNANCIES INCLUDED AND EXCLUDED FROM ANALYSES

|                                                            | <i>Included</i> (N=87,600) | <i>Excluded</i> |             |
|------------------------------------------------------------|----------------------------|-----------------|-------------|
|                                                            |                            | N               | N (%)       |
| <b>Sociodemographic characteristics</b>                    |                            |                 |             |
| Age (years), mean (SD)                                     | 30.2 (5.4)                 | 48,897          | 30.4 (5.6)  |
| Race/ethnicity, <i>n</i> (%)                               |                            | 48,727          |             |
| White                                                      | 35,991 (41)                |                 | 17,159 (36) |
| Black                                                      | 5011 (6)                   |                 | 3429 (7)    |
| Hispanic                                                   | 21,733 (25)                |                 | 12,377 (25) |
| Asian/Pacific Islander                                     | 20,994 (24)                |                 | 13,133 (27) |
| Native American/multiracial                                | 3117 (4)                   |                 | 1764 (4)    |
| Other/unknown                                              | 754 (1)                    |                 | 505 (1)     |
| Prepregnancy BMI category, <i>n</i> (%)                    |                            | 42,147          |             |
| Underweight                                                | 2394 (3)                   |                 | 1588 (4)    |
| Normal weight                                              | 42,020 (48)                |                 | 20,511 (49) |
| Overweight                                                 | 23,740 (27)                |                 | 11,164 (26) |
| Obese                                                      | 19,446 (22)                |                 | 8884 (21)   |
| Medicaid, <i>n</i> (%)                                     | 5688 (6)                   | 48,893          | 3109 (6)    |
| <b>Pregnancy characteristics</b>                           |                            |                 |             |
| Nulliparous, <i>n</i> (%)                                  | 31,545 (36)                | 47,698          | 17,547 (37) |
| Smoking during early pregnancy, <i>n</i> (%)               | 3591 (4)                   | 48,897          | 814 (2)     |
| Alcohol use during early pregnancy, <i>n</i> (%)           | 31,411 (36)                | 48,897          | 7443 (15)   |
| Gestational age at first prenatal visit (weeks), mean (SD) | 6.3 (2.2)                  | 48,895          | 6.8 (2.7)   |
| <b>Year of conception</b>                                  |                            |                 |             |
| 2011                                                       | 10,207 (12)                |                 | 9288 (19)   |
| 2012                                                       | 15,624 (18)                |                 | 10,577 (22) |
| 2013                                                       | 17,652 (20)                |                 | 9052 (19)   |
| 2014                                                       | 18,623 (21)                |                 | 8968 (18)   |
| 2015                                                       | 20,243 (23)                |                 | 8897 (18)   |
| 2016                                                       | 5251 (6)                   |                 | 2115 (4)    |
